# Supplementary material for: Small RNA discovery in the interaction between barley and the powdery mildew pathogen
Source: PubMed Central journal article supplement (PMC6657096; doi:10.1186/s12864-019-5947-z), 2019-07-25

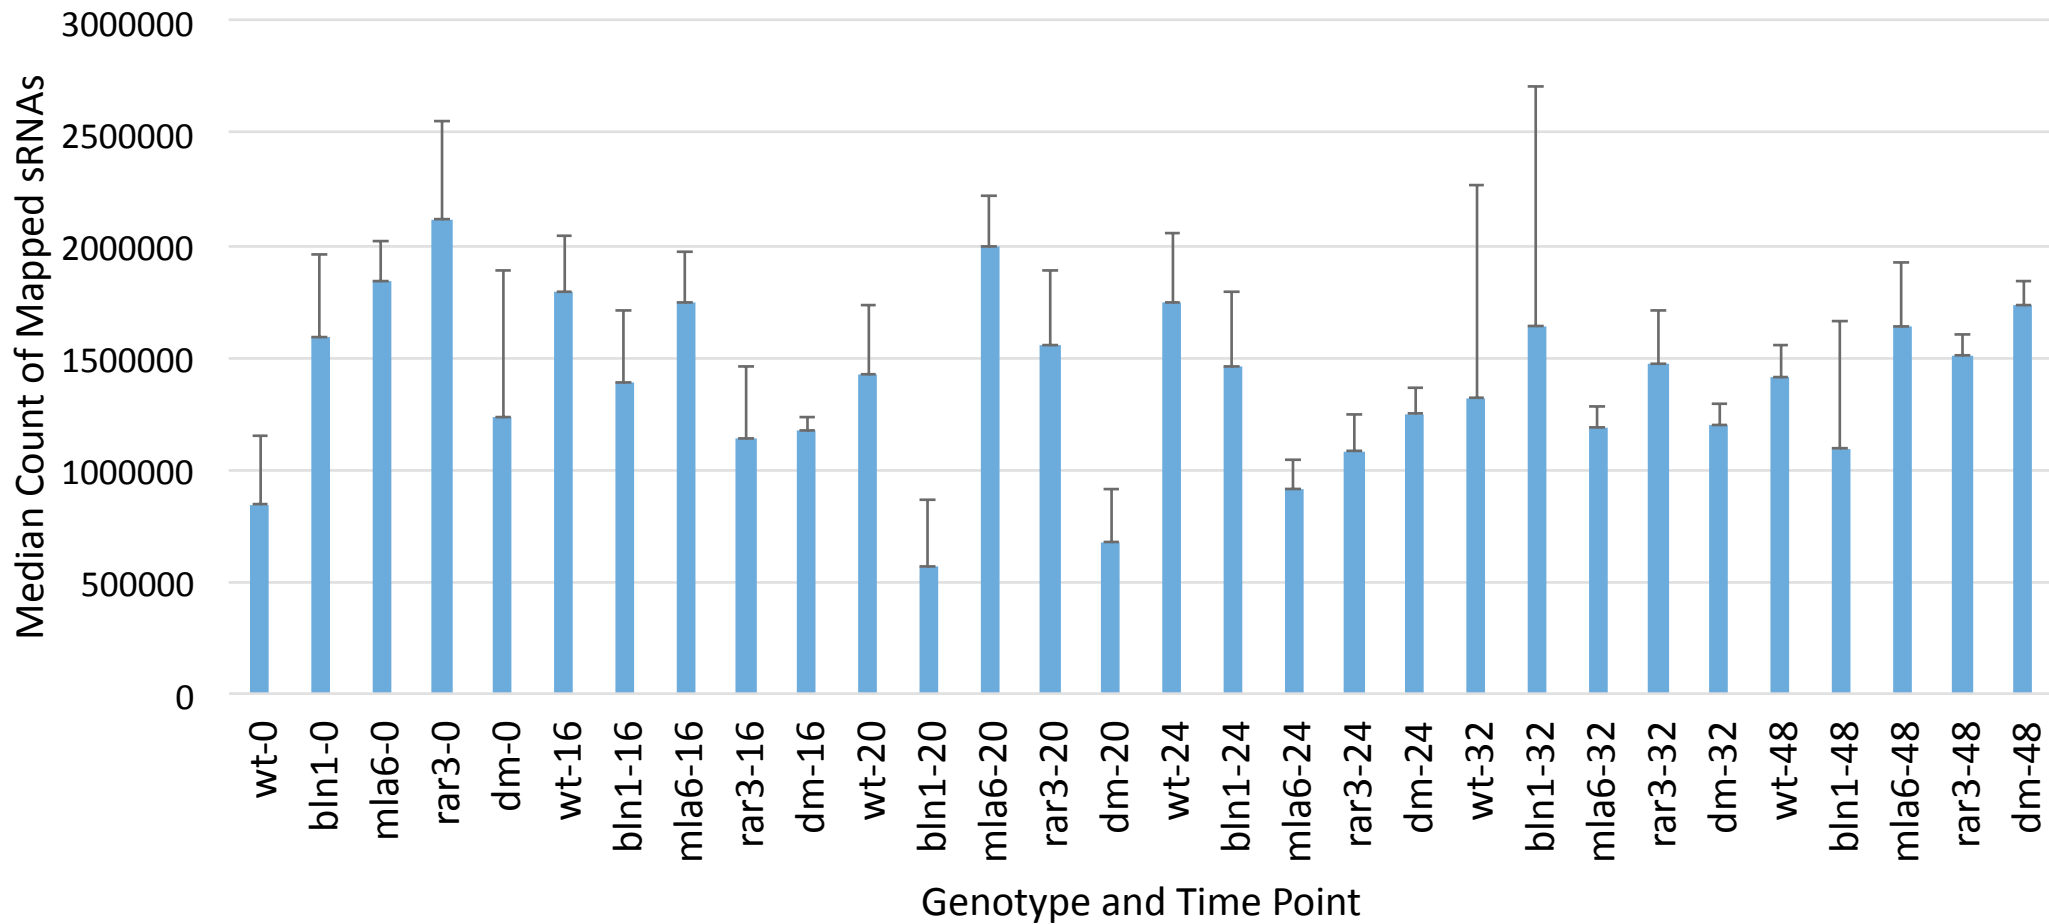

Supplement: 12864_2019_5947_MOESM1_ESM.pdf [file 12864_2019_5947_MOESM1_ESM.pdf]
